# Supplementary material for: Update on lactose malabsorption and intolerance: pathogenesis, diagnosis and clinical management
Source: PubMed Central journal article supplement — Gut. 2019 Aug 19;68(11):2080–91. doi: 10.1136/gutjnl-2019-318404 (PMC6839734; doi:10.1136/gutjnl-2019-318404), 2019-08-19
Supplement: gutjnl-2019-318404supp001.pdf [file gutjnl-2019-318404supp001.pdf]

| Country    | Ethnicity                                             | LM    | n | Sex                             | Method               | Age                   | Study population                                                                                                                        | Kilde                                    |
|------------|-------------------------------------------------------|-------|---|---------------------------------|----------------------|-----------------------|-----------------------------------------------------------------------------------------------------------------------------------------|------------------------------------------|
| Algeria    | Mozabite                                              | 0.61  |   | 60 Not specified                | Genotyping           | Not specified         | DNA samples. Selection criteria not further specified                                                                                   | Bersaglieri, 04 (with adaptations in Ita |
| Angola*    | Mixed                                                 | 0.94  |   | 342 Not specified               | Genotyping           | Not specified         |                                                                                                                                         |                                          |
| Angola     | Kuvale                                                | 0.88  |   | 54 Not specified                | Genotyping           | Not specified         | Individuals were grouped according to self-identified ethnicity, and only samples from unrelated individuals were included in the study | Coelho, 09                               |
| Angola     | Nyaneka-Nkhumbi                                       | 0.94  |   | 153 Not specified               | Genotyping           | Not specified         | Individuals were grouped according to self-identified ethnicity, and only samples from unrelated individuals were included in the study | Coelho, 09                               |
| Angola     | Ovimbundu                                             | 0.98  |   | 96 Not specified                | Genotyping           | Not specified         | Individuals were grouped according to self-identified ethnicity, and only samples from unrelated individuals were included in the study | Coelho, 09                               |
| Angola     | San                                                   | 0.9   |   | 20 Not specified                | Genotyping           | Not specified         | Not specified                                                                                                                           | Breton, 2014. Lactase                    |
| Angola     | San (Khoe speaking) in Angola, Botswana and Namibia   | 0.95  |   | 19 Not specified                | Genotyping           | Not specified         | Not specified                                                                                                                           | Breton, 2014. Lactase                    |
| Australia* | Mixed                                                 | 0.436 |   | 116 40M,75F                     | HBT                  |                       |                                                                                                                                         |                                          |
| Australia  | Caucasians                                            | 0.18  |   | 71 20M,51F (converted)          | HBT (def. 3)         | Median 34 (29-46)     | Healthy volunteers (control subjects)                                                                                                   | Barrett, 2009. Comparison                |
| Australia  | Aboriginal adults (around Derby in Western Australia) | 0.84  |   | 20M,24F (one missing from data) | HBT (def. 1)         | Mean 41 (15-75)       | Subjects were drawn from the full-blood adult Aboriginal population living in and around Derby, Western Australia                       | Brand, 1983. Lactose                     |
| Austria*   | Mixed                                                 | 0.218 |   | 830 497M,333F                   | Genotyping, HBT, LTT |                       |                                                                                                                                         |                                          |
| Austria    | Adolescent Austrians                                  | 0.201 |   | 528 258M,270F                   | HBT (def.1)          | Mean 22.1 (16-72)     | Healthy volunteers (students and hospital workers)                                                                                      | Rosenkranz, 82. Distribution             |
| Austria    | Not specified                                         | 0.2   |   | 30 0M,30F                       | HBT (def. 1)         | Mean 43.6 (16-60)     | Healthy volunteers (outpatients, medical health checkup)                                                                                | Ledochowski, 98. Lactose                 |
| Austria    | Not specified                                         | 0.121 |   | 33 0 M, 33 F                    | LTT (def. 1)         | Mean 56 (33-67)       | Presumably healthy women (controls).                                                                                                    | Finkenstedt, 86. Lactose.                |
| Austria    | Caucasian men (ethnicity not specified)               | 0.27  |   | 239 239M,0F                     | Genotyping           | Mean 61.9 ± 9 (50-85) | Population-based study and individuals attending an endocrinology outpatient clinic. Apparently healthy.                                | Gugatschka, 2007. Calcium                |
| Belgium    | Not specified                                         | 0.15  |   | 1051 313 M, 738 F               | HBT (def. 1)         | Mean 36.2             | Randomly selected individuals.                                                                                                          | Houben, 15. Additional                   |
| Botswana   | San (Khoe speaking)                                   | 0.85  |   | 20 Not specified                | Genotyping           | Not specified         | Not specified                                                                                                                           | Breton, 2014. Lactase                    |
| Brazil*    | Mixed                                                 | 0.602 |   | 2808 N/A                        | Genotyping           |                       |                                                                                                                                         |                                          |
| Brazil     | Not specified                                         | 0.591 |   | 501 Not specified               | Genotyping           | Not specified         | Randomly selected healthy volunteers. Selected randomly among those who came from several city health centers for free routine          | De Campos, 2016. Hypolactasia.           |
| Brazil     | Individuals in Porto Alegre (European ancestry)       | 0.486 |   | 337 Not specified               | Genotyping           | Not specified         | blood determinations. Selected randomly among those who came from several city health centers for free routine                          | Friedrich, 2012. Several                 |
| Brazil     | Individuals in Porto Alegre (African ancestry)        | 0.681 |   | 182 Not specified               | Genotyping           | Not specified         | blood determinations.                                                                                                                   | Friedrich, 2012. Several                 |
| Brazil     | Individuals in Belem                                  | 0.69  |   | 200 Not specified               | Genotyping           | Not specified         | Healthy adolescents                                                                                                                     | Friedrich, 2012. Several                 |
| Brazil     | Individuals in Recife                                 | 0.634 |   | 262 Not specified               | Genotyping           | Not specified         | Not clearly specified                                                                                                                   | Friedrich, 2012. Several                 |

|           |                                                                              |       |      |                          |                             |                          |                                                                                                                                   |                                          |
|-----------|------------------------------------------------------------------------------|-------|------|--------------------------|-----------------------------|--------------------------|-----------------------------------------------------------------------------------------------------------------------------------|------------------------------------------|
| Brazil    | 4 groups of Amerindians (Guarani-Kaiowá, Guarani-Nandeva, Kaingang, Xavante) | 0.946 | 316  | Not specified            | Genotyping                  | Not specified            | Not clearly specified                                                                                                             | Friedrich, 2012. Stability               |
| Brazil    | Euro-Brazilians from South Brazil                                            | 0.445 | 292  | 142M,150F                | Genotyping                  | 18-64                    | Blood donors                                                                                                                      | Boschmann, 2016. The frequency           |
| Brazil    | Mennonites from South Brazil                                                 | 0.12  | 151  | 73M,78F                  | Genotyping                  | 18-89                    | Not specified                                                                                                                     | Boschmann, 2016. The frequency           |
| Brazil    | White people                                                                 | 0.566 | 399  | 27.7% men (entire study) | Genotyping                  | 42.1 ± 16 (entire study) | Randomly selected asymptomatic and dyspeptic individuals (volunteers)                                                             | Mattar, 09. Frequency                    |
| Brazil    | Brown people                                                                 | 0.569 | 65   | 27.7% men (entire study) | Genotyping                  | 42.1 ± 16 (entire study) | Randomly selected asymptomatic and dyspeptic individuals (volunteers)                                                             | Mattar, 09. Frequency                    |
| Brazil    | Black people                                                                 | 0.8   | 50   | 27.7% men (entire study) | Genotyping                  | 42.1 ± 16 (entire study) | Randomly selected asymptomatic and dyspeptic individuals (volunteers)                                                             | Mattar, 09. Frequency                    |
| Brazil    | Japanese-Brazilians                                                          | 1     | 53   | study)                   | Genotyping                  | 42.1 ± 16 (entire study) | Randomly selected asymptomatic and dyspeptic individuals (volunteers)                                                             | Mattar, 09. Frequency                    |
| Cambodia  | Cambodian                                                                    | 1     | 22   | Not specified            | Genotyping                  | Not specified            | DNA samples. Selection criteria not further specified                                                                             | Bersaglieri, 04                          |
| Cameroon* | Mixed                                                                        | 0.949 | 928  |                          | Genotyping                  |                          |                                                                                                                                   |                                          |
| Cameroon  | Mambila                                                                      | 1     | 122  | Not specified            | Genotyping                  | Not specified            | Not specified                                                                                                                     | Jones, 2015. Diversity (supplementa      |
| Cameroon  | Mambila                                                                      | 0.99  | 244  | Not specified            | Genotyping                  | Not specified            | DNA samples. Selection criteria not further specified                                                                             | Mulcare,04                               |
| Cameroon  | Shuwa Arab                                                                   | 0.849 | 102  | Not specified            | Genotyping                  | Not specified            | Not specified                                                                                                                     | Jones, 2015. Diversity (supplementa      |
| Cameroon  | Fulbe                                                                        | 0.79  | 98   | Not specified            | Genotyping                  | Not specified            | DNA samples. Selection criteria not further specified                                                                             | Mulcare, 04                              |
| Cameroon  | Hausa                                                                        | 0.74  | 36   | Not specified            | Genotyping                  | Not specified            | DNA samples. Selection criteria not further specified                                                                             | Mulcare, 04                              |
| Cameroon  | Nso                                                                          | 1     | 252  | Not specified            | Genotyping                  | Not specified            | DNA samples. Selection criteria not further specified                                                                             | Mulcare, 04                              |
| Cameroon  | Yamba                                                                        | 1     | 42   | Not specified            | Genotyping                  | Not specified            | DNA samples. Selection criteria not further specified                                                                             | Mulcare, 04                              |
| Cameroon  | Pygmy                                                                        | 1     | 32   | Not specified            | Genotyping                  | Not specified            | Not specified                                                                                                                     | Jones, 2015. Diversity (supplementa      |
| Canada    | Mixed                                                                        | 0.59  | 39   |                          |                             |                          |                                                                                                                                   |                                          |
| Canada    | Manitoban Indians (Sioux and Saulteux)                                       | 0.91  | 22   | Not specified            | LTT (def. b)                | 16+                      | Randomly chosen from community                                                                                                    | Ellestad Sayed, 1977. Disaccharide       |
| Canada    | Czechoslovakian immigrants in Western Canada                                 | 0.176 | 17   | 42% men (entire study)   | LTT (def. b)                | 17-65 (entire stu        | Healthy, randomly selected volunteers (immigrants)                                                                                | Leichter, 1972. Lactose                  |
| Chile*    | Mixed                                                                        | 0.558 | 265  | N/A                      | Genotyping, HBT             |                          |                                                                                                                                   |                                          |
| Chile     | Not specified                                                                | 0.34  | 121  | 22 % men                 | HBT (def. 2) and genotyping | Average 20.8 (18-25)     | Healthy, randomly selected volunteers (students). Double blinded placebo study.                                                   | Latorre, 2014. Prevalence                |
| Chile     | Mapuche Populations From Southern Chile                                      | 0.9   | 29   | Not specified            | Genotyping                  | 18+                      | Sampling was performed in local markets, public squares, community centers, and volunteer residences at different rural locations | Fernandez, 2014. Brief                   |
| Chile     | Mestizo Populations From Southern Chile                                      | 0.7   | 115  | Not specified            | Genotyping                  | 18+                      | Sampling was performed in local markets, public squares, community centers, and volunteer residences at different rural locations | Fernandez, 2014. Brief                   |
| China*    | Mixed                                                                        | 0.845 | 1754 | N/A                      | Genotyping, HBT             |                          |                                                                                                                                   |                                          |
| China     | People from 13 different regions in China                                    | 1     | 330  | Not specified            | Genotyping                  | Not specified            | DNA samples. Selection criteria not further specified                                                                             | Bersaglieri, 04 (with adaptations in Ita |
| China     | Mongol                                                                       | 0.951 | 82   | Not specified            | Genotyping                  | Not specified            | A total of 373 healthy unrelated individuals were randomly selected from 5 northern Chinese populations.                          | Sun, 07. The                             |
| China     | Mongol                                                                       | 0.81  | 20   | Not specified            | Genotyping                  | Not specified            | DNA samples. Selection criteria not further specified                                                                             | Bersaglieri, 04 (with adaptations in Ita |
| China     | Uygur                                                                        | 0.9   | 20   | Not specified            | Genotyping                  | Not specified            | DNA samples. Selection criteria not further specified                                                                             | Bersaglieri, 04 (with adaptations in Ita |

|           |                                                         |       |      |                |                   |                                   |                                                                                                                                                                                                                          |                                                                     |
|-----------|---------------------------------------------------------|-------|------|----------------|-------------------|-----------------------------------|--------------------------------------------------------------------------------------------------------------------------------------------------------------------------------------------------------------------------|---------------------------------------------------------------------|
| China     | Kazakh in the north of China                            | 0.764 | 195  | 150M,45F       | HBT (def. 1)      | Average 20.9 (16-28)              | Healthy volunteers (students and teaching staff of Xinjiang University in Urumchi)                                                                                                                                       | Wang, 84. Prevalence                                                |
| China     | Kazak                                                   | 0.904 | 94   | Not specified  | Genotyping        | Not specified                     | A total of 373 healthy unrelated individuals were randomly selected from 5 northern Chinese populations.                                                                                                                 | Sun, 07. The                                                        |
| China     | Man                                                     | 1     | 75   | Not specified  | Genotyping        | Not specified                     | A total of 373 healthy unrelated individuals were randomly selected from 5 northern Chinese populations.                                                                                                                 | Sun, 07. The                                                        |
| China     | Oroqen                                                  | 0.978 | 45   | Not specified  | Genotyping        | Not specified                     | A total of 373 healthy unrelated individuals were randomly selected from 5 northern Chinese populations.                                                                                                                 | Sun, 07. The                                                        |
| China     | Hezhen                                                  | 1     | 77   | Not specified  | Genotyping        | Not specified                     | A total of 373 healthy unrelated individuals were randomly selected from 5 northern Chinese populations.                                                                                                                 | Sun, 07. The                                                        |
| China     | People in Sichuan                                       | 0.36  | 182  | Not specified  | HBT (def. 1)      | 20-70                             | Healthy volunteers, cluster random sampling method                                                                                                                                                                       | Qiao, 11. Milk                                                      |
| China     | Not specified                                           | 0.281 | 64   | 33 m, 31 f     | HBT (unspecified) | Mean 41                           | Presumably healthy controls.                                                                                                                                                                                             | Luo, 13. Lactose                                                    |
| China     | Singapore-born Chinese                                  | 0.95  | 77   | 50M,27F        | HBT (def.1)       | Mean 23 (19-35)                   | Healthy volunteers in prevalence study                                                                                                                                                                                   | Yap, 89. Lactase                                                    |
| China     | Canada-born Chinese                                     | 0.98  | 49   | 23M,26F        | HBT (def. 1)      | Mean 19.7 (14-33)                 | Healthy volunteers in prevalence study                                                                                                                                                                                   | Yap, 89. Lactase                                                    |
| China     | Han Chinese                                             | 1     | 100  | Not specified  | Genotyping        | Not specified                     | Population samples. GenBank accession number DQ109677                                                                                                                                                                    | Enattah, 2007. Evidence                                             |
| China     | Han Chinese in the north of China                       | 0.923 | 248  | 141M,107F      | HBT (def. 1)      | Average 25.5 (17-35)<br>Mean 37.1 | Healthy volunteers (members of staff of three institutes of Academic Sinica in Beijing, and cadres or workers of two agricultural institutions in the same area)                                                         | Wang, 84. Prevalence = Yongfa 84                                    |
| China     | Not specified                                           | 0.91  | 32   | About 50 % men | HBT (def. 1)      | ±11.5                             | Healthy control subjects                                                                                                                                                                                                 | Zhao, 10. Lactose                                                   |
| China     | People in Hangzhou, ethnicity not specified             | 0.75  | 64   | 33M,31F        | HBT (def. 1)      | Mean 41                           | Healthy control subjects without history of digestive symptoms were recruited through public advertisement.                                                                                                              | Zhu, 2013. Bloating                                                 |
| Colombia  | Caribbean                                               | 0.8   | 128  | Not specified  | Genotyping        | Mean 35 (17-69)                   | A group of 128 healthy individuals. None of the individuals were smokers, showed digestive disease, had undergone abdominal surgery nor had undergone antibiotic treatment within the last 3 months preceding the study. | Mendoza, 12. Diagnosis                                              |
| Congo     | Brazaville                                              | 1     | 90   | Not specified  | Genotyping        | Not specified                     | Not specified                                                                                                                                                                                                            | Jones, 2015. Diversity (supplementa                                 |
| Crete     | Not specified                                           | 0.56  | 50   | Not specified  | LTT (def. a)      | Mean 23.3                         | Healthy volunteers                                                                                                                                                                                                       | Kanaghinis, 1974. Primary                                           |
| Cyprus    | Greek Cypriots                                          | 0.66  | 50   | Not specified  | LTT (def. a)      | Mean 21.5                         | Healthy volunteers                                                                                                                                                                                                       | Kanaghinis, 1974. Primary                                           |
| DR Congo  | Bantu speakers                                          | 1     | 11   | Not specified  | Genotyping        | Not specified                     | Not specified                                                                                                                                                                                                            | Breton, 2014. Lactase                                               |
| Denmark   | Danes                                                   | 0.044 | 91   | Not specified  | LTT (def. a)      | 20+                               | Healthy volunteers (medical students)                                                                                                                                                                                    | Busk, 1975. Incidence                                               |
| Egypt*    | Mixed                                                   | 0.343 | 172  | 165M,7F        | LTT (def. c)      | 19-65                             | Healthy subjects (high-school students, residents of Baries oasis, and workers in a phosphate mine)                                                                                                                      | Hussein, 1994. The frequency                                        |
| Egypt     | Ethnic groups from the New Valley in the Western Desert | 0.51  | 100  | 100M,0F        | LTT (def. c)      | 19-65                             | Healthy subjects (high-school students, residents of Baries oasis, and workers in a phosphate mine)                                                                                                                      | Hussein, 1994. The frequency                                        |
| Egypt     | Ethnic groups from Sinai in the Eastern Desert          | 0.11  | 72   | 65M,7F         | LTT (def. c)      | 15-69                             | Healthy subjects (workers in a coal mine, goat and camel shepherds, fisher men)                                                                                                                                          | Hussein, 1994. The frequency<br>Lember, 06. Lactase non-persistence |
| Estonia   | Estonians (at least 3 grand parents Estonians)          | 0.248 | 314  | About 45 % men | Genotyping        | 25-70                             | Population study (randomly selected)                                                                                                                                                                                     |                                                                     |
| Ethiopia* | Mixed                                                   | 0.811 | 1182 |                | Genotyping        |                                   |                                                                                                                                                                                                                          |                                                                     |

|                         |                          |       |      |               |                   |                   |                                                                                                                                                                                                                                                               |                                        |
|-------------------------|--------------------------|-------|------|---------------|-------------------|-------------------|---------------------------------------------------------------------------------------------------------------------------------------------------------------------------------------------------------------------------------------------------------------|----------------------------------------|
| Ethiopia                | Afar                     | 0.309 | 144  | Not specified | Genotyping        | Not specified     | Not specified                                                                                                                                                                                                                                                 | Jones, 2015. Diversity (supplementa    |
| Ethiopia                | Amharic                  | 0.763 | 142  | Not specified | Genotyping        | Not specified     | Not specified                                                                                                                                                                                                                                                 | Jones, 2015. Diversity (supplementa    |
| Ethiopia                | Anuak                    | 1     | 138  | Not specified | Genotyping        | Not specified     | Not specified                                                                                                                                                                                                                                                 | Jones, 2015. Diversity (supplementa    |
| Ethiopia                | Maale                    | 0.784 | 122  | Not specified | Genotyping        | Not specified     | Not specified                                                                                                                                                                                                                                                 | Jones, 2015. Diversity (supplementa    |
| Ethiopia                | Manjo                    | 0.903 | 60   | Not specified | Genotyping        | Not specified     | Not specified                                                                                                                                                                                                                                                 | Jones, 2015. Diversity (supplementa    |
| Ethiopia                | Nuer                     | 1     | 238  | Not specified | Genotyping        | Not specified     | DNA samples. Selection criteria not further specified                                                                                                                                                                                                         | Mulcare, 04                            |
| Ethiopia                | Nuer                     | 1     | 66   | Not specified | Genotyping        | Not specified     | Not specified                                                                                                                                                                                                                                                 | Jones, 2015. Diversity (supplementa    |
| Ethiopia                | Oromo                    | 0.657 | 148  | Not specified | Genotyping        | Not specified     | Not specified                                                                                                                                                                                                                                                 | Jones, 2015. Diversity (supplementa    |
| Ethiopia                | Shabo                    | 1     | 40   | Not specified | Genotyping        | Not specified     | Not specified                                                                                                                                                                                                                                                 | Jones, 2015. Diversity (supplementa    |
| Ethiopia                | Suri                     | 0.907 | 84   | Not specified | Genotyping        | Not specified     | Not specified                                                                                                                                                                                                                                                 | Jones, 2015. Diversity (supplementa    |
| Finland*                | Mixed                    | 0.19  | 5003 |               | Genotyping, LTT   |                   |                                                                                                                                                                                                                                                               |                                        |
| Finland                 | Mountain Saami (Inari)   | 0.37  | 75   | Not specified | LTT (def. g)      | Not specified     | Not specified                                                                                                                                                                                                                                                 | Kozlov, 97                             |
| Finland                 | Mountain Saami (Utsjoki) | 0.34  | 158  | Not specified | LTT (def. g)      | Not specified     | Not specified                                                                                                                                                                                                                                                 | Kozlov, 97                             |
| Finland                 | Saami (Inari, fisher)    | 0.25  | 110  | Not specified | LTT (def. g)      | Not specified     | Not specified                                                                                                                                                                                                                                                 | Kozlov, 97                             |
| Finland                 | Not specified            | 0.176 | 2265 | Not specified | Genotyping        | 24-39             | Prospective cohort study (The Cardiovascular Risk in Young Finns Study). Randomly selected from the national population register, Recruits of the Finnish Army men of similar age who had postponed their military service for reasons not related to health. | Lehtimaki, 06. The effects             |
| Finland                 | Not specified            | 0.171 | 234  | 234M,0F       | Genotyping        | 18.3-20.6         | Control group. Recruits of the Finnish Army men of similar age who had postponed their military service for reasons not related to health.                                                                                                                    | Enattah, 2004. Molecularly             |
| Finland                 | Not specified            | 0.18  | 1900 | Not specified | Genotyping        | 18-64             |                                                                                                                                                                                                                                                               | Anthoni, 2007. Molecularly             |
| Finland                 | Saami                    | 0.667 | 30   | Not specified | Genotyping        | Not specified     | Population samples. GenBank accession number DQ109677                                                                                                                                                                                                         | Enattah, 2007. Evidence                |
| Finland                 | Eastern Finland          | 0.234 | 77   | Not specified | Genotyping        | Not specified     | Population samples. GenBank accession number DQ109677                                                                                                                                                                                                         | Enattah, 2007. Evidence                |
| Finland                 | Western Finland          | 0.163 | 154  | Not specified | Genotyping        | Not specified     | Population samples. GenBank accession number DQ109677                                                                                                                                                                                                         | Enattah, 2007. Evidence                |
| France*                 | Mixed                    | 0.251 | 123  |               | Genotyping        |                   |                                                                                                                                                                                                                                                               |                                        |
| France                  | French                   | 0.32  | 58   | Not specified | Genotyping        | Not specified     | DNA samples. Seletion criteria not further specified                                                                                                                                                                                                          | Bersaglieri, 04 (with adaptions in Ita |
| France                  | French Basque            | 0.11  | 48   | Not specified | Genotyping        | Not specified     | DNA samples. Seletion criteria not further specified                                                                                                                                                                                                          | Bersaglieri, 04 (with adaptions in Ita |
| France                  | Not specified            | 0.412 | 17   | Not specified | Genotyping        | Not specified     | Population samples. GenBank accession number DQ109677                                                                                                                                                                                                         | Enattah, 2007. Evidence                |
| Germany                 | Ethnic germans           | 0.148 | 1805 | 1572M,233F    | HBT (def. 1)      | Mean 20.3 (16-52) | Healthy volunteers. Consprited soldiers, students, health workers.                                                                                                                                                                                            | Flatz, 1982. Distribution              |
| Ghana*                  | Mixed                    | 1     | 302  | Not specified | Genotyping        | Not specified     |                                                                                                                                                                                                                                                               |                                        |
| Ghana                   | Ghanaian                 | 1     | 196  | Not specified | Genotyping        | Not specified     | The study material consisted of 171 samples collected from Southern Africa for the study of genetic risk factors affecting esophageal cancer                                                                                                                  | Torniainen, 09. Screening              |
| Ghana                   | Asante                   | 1     | 68   | Not specified | Genotyping        | Not specified     | Not specified                                                                                                                                                                                                                                                 | Jones, 2015. Diversity (supplementa    |
| Ghana                   | Builsa                   | 1     | 38   | Not specified | Genotyping        | Not specified     | Not specified                                                                                                                                                                                                                                                 | Jones, 2015. Diversity (supplementa    |
| Great Britain*          | Mixed                    | 0.085 | 3502 |               |                   |                   |                                                                                                                                                                                                                                                               |                                        |
| Great Britain (England) | White in West Birmingham | 0.03  | 67   | Not specified | Intestinal biopsy | Not specified     | Dyspepsia patients attending for routine upper GI endoscopy. Patients with intestinal disease excluded. To ensure representativeness, HBT were performed on a control group of 20 healthy adult volunteers (10 Indian and 10 Afro-Caribbean).                 | Iqbal, 1993. Prevalence                |

|                                   |                                    |       |      |               |                      |                   |                                                                                                                                                                                                                                               |                           |
|-----------------------------------|------------------------------------|-------|------|---------------|----------------------|-------------------|-----------------------------------------------------------------------------------------------------------------------------------------------------------------------------------------------------------------------------------------------|---------------------------|
| Great Britain (England)           | Indians in West Birmingham         | 0.55  | 55   | Not specified | Intestinal biopsy    | Not specified     | Dyspepsia patients attending for routine upper GI endoscopy. Patients with intestinal disease excluded. To ensure representativeness, HBT were performed on a control group of 20 healthy adult volunteers (10 Indian and 10 Afro-Caribbean). | Iqbal, 1993. Prevalence   |
| Great Britain (England)           | Afro Caribbeans in West Birmingham | 0.82  | 50   | Not specified | Intestinal biopsy    | Not specified     | Dyspepsia patients attending for routine upper GI endoscopy. Patients with intestinal disease excluded. To ensure representativeness, HBT were performed on a control group of 20 healthy adult volunteers (10 Indian and 10 Afro-Caribbean). | Iqbal, 1993. Prevalence   |
| Great Britain (England)           | South East England (white)         | 0.091 | 1013 | 0M,1013F      | Genotyping           | Mean 69 (60-79)   | Population sample with data from the British Women's Heart and Health Study. British-born women identified as white and who have complete data for genotype, area of birth and area of residence data                                         | Smith, 09. Lactase        |
| Great Britain (England and Wales) | Midland and Wales (white)          | 0.058 | 499  | 0M,499F       | Genotyping           | Mean 69 (60-79)   | Population sample with data from the British Women's Heart and Health Study. British-born women identified as white and who have complete data for genotype, area of birth and area of residence data                                         | Smith, 09. Lactase        |
| Great Britain (England)           | North England (white)              | 0.062 | 1361 | 0m,1361F      | Genotyping           | Mean 69 (60-79)   | Population sample with data from the British Women's Heart and Health Study. British-born women identified as white and who have complete data for genotype, area of birth and area of residence data                                         | Smith, 09. Lactase        |
| Great Britain (Scotland)          | Scotland (white)                   | 0.041 | 442  | 0m,442F       | Genotyping           | Mean 69 (60-79)   | Population sample with data from the British Women's Heart and Health Study. British-born women identified as white and who have complete data for genotype, area of birth and area of residence data                                         | Smith, 09. Lactase        |
| Great Britain (Wales)             | Wales (white)                      | 0     | 15   | 4 m, 11 f     | Genotyping           | Mean 40.7 (25-60) | Healthy, white Europeans.                                                                                                                                                                                                                     | Waud, 08. Measurement     |
| Greece*                           | Mixed                              | 0.557 | 900  |               | Genotyping, HBT, LTT |                   |                                                                                                                                                                                                                                               |                           |
| Greece                            | Greek                              | 0.83  | 100  | Not specified | Genotyping           | Not specified     | Blood and buccal swab samples were obtained from unrelated donors upon informed consent.                                                                                                                                                      | Anagnostou, 09. Tracing   |
| Greece                            | Not specified                      | 0.75  | 200  | 93M,107F      | HBT (def. 1)         | Mean 37 (15-80)   | Healthy volunteers in prevalence study                                                                                                                                                                                                        | Ladas, 1982. Lactose      |
| Greece                            | Continental Greeks                 | 0.447 | 600  | Not specified | LTT (def. a)         | Mean 39.5         | In-patients from medical wards. Most without GI diseases                                                                                                                                                                                      | Kanaghinis, 1974. Primary |
| Hungary*                          | Mixed                              | 0.386 | 1176 |               |                      |                   |                                                                                                                                                                                                                                               |                           |
| Hungary                           | Present day Hungarians             | 0.39  | 181  | Not specified | Genotyping           | Not specified     | Random samples from volunteers. Health not specified                                                                                                                                                                                          | Nagy, 11. Comparison      |
| Hungary                           | Seklers (Eastern Transylvania)     | 0.29  | 65   | Not specified | Genotyping           | Not specified     | Random samples from volunteers. Health not specified                                                                                                                                                                                          | Nagy, 11. Comparison      |
| Hungary                           | Caucasian-Hungarian individuals    | 0.37  | 110  | Not specified | Genotyping           | 19-26             | Randomly selected volunteers (control group). Health not specified                                                                                                                                                                            | Nagy, 09. Prevalence      |
| Hungary                           | General population                 | 0.37  | 535  | 170M,365F     | HBT (def. 1)         | Mean 21.7 (17-39) | Healthy volunteers (students and staff members of several educational institutions)                                                                                                                                                           | Czeizel, 1983. Prevalence |
| Hungary                           | Matyos                             | 0.366 | 172  | 0M,172F       | HBT (def. 1)         | Mean 38.6 (16-54) | Not specified                                                                                                                                                                                                                                 | Czeizel, 1983. Prevalence |
| Hungary                           | Romai                              | 0.558 | 113  | 90M,23F       | HBT (def. 1)         | Mean 28.5 (16-47) | Not specified                                                                                                                                                                                                                                 | Czeizel, 1983. Prevalence |
| India*                            | Mixed                              | 0.569 | 768  |               | Genotyping, HBT, LTT |                   |                                                                                                                                                                                                                                               |                           |

|         |                             |       |      |               |                 |                   |                                                                                                                                                                                                                                                              |                                        |
|---------|-----------------------------|-------|------|---------------|-----------------|-------------------|--------------------------------------------------------------------------------------------------------------------------------------------------------------------------------------------------------------------------------------------------------------|----------------------------------------|
| India   | Natives from Northern India | 0.61  | 252  | 197M,55F      | Genotyping      | 37.2 ± 11.5       | Control subjects in IBS-study. Healthy (no psychiatric or medical illness)                                                                                                                                                                                   | Kumar, 2011. Frequency                 |
| India   | New Dehli                   | 0.267 | 45   | 19 M, 26 F    | HBT (def. 1)    | Mean 36,2         | Healthy controls                                                                                                                                                                                                                                             | Gupta, 12. Evaluation                  |
| India   | North                       | 0.675 | 77   | 55M,22F       | Genotyping      | 37.8 ± 17.7       | Healthy volunteers                                                                                                                                                                                                                                           | Babu, 2010, Frequency                  |
| India   | North                       | 0.274 | 124  | 76M,48F       | LTT (def. a)    | 11-65             | Healthy volunteers                                                                                                                                                                                                                                           | Tandon, 81. Lactose                    |
| India   | Not specified               | 0.6   | 53   | 38 M, 15 F    | HBT (def. 1)    | Mean 33,5         | Healthy controls                                                                                                                                                                                                                                             | Gupta, 07. Lactose                     |
| India   | Not specified               | 0.585 | 81   | 81M,0F        | HBT (def. 2)    | 67.4 ± 10.4       | Control subjects in prostate cancer study. Healthy volunteers (consisting of patients' attendants and hospital staff).                                                                                                                                       | Agarwal, 2008. Lactose                 |
| India   | South                       | 0.666 | 60   | 22M,38F       | LTT (def. a)    | 10-70             | Healthy volunteers                                                                                                                                                                                                                                           | Tandon, 81. Lactose                    |
| India   | South                       | 0.868 | 76   | 37M,49F       | Genotyping      | 41.3 ± 15         | Healthy volunteers                                                                                                                                                                                                                                           | Babu, 2010, Frequency                  |
| Iran*   | Mixed                       | 0.848 | 52   |               | Genotyping, LTT |                   |                                                                                                                                                                                                                                                              |                                        |
| Iran    | Iranians                    | 0.86  | 21   | 12M,9F        | LTT (def. b)    | 20-25             | Healthy volunteers (students)                                                                                                                                                                                                                                | Sadre, 79. Lactose                     |
| Iran    | Iranians                    | 0.81  | 21   | Not specified | Genotyping      | Not specified     | Not specified                                                                                                                                                                                                                                                | Enattah, 2007. Evidence                |
| Iran    | Qashqai                     | 0.9   | 10   | Not specified | Genotyping      | Not specified     | Population samples. GenBank accession number DQ109677                                                                                                                                                                                                        | Enattah, 2007. Evidence                |
| Iraq    | Iraqi in Israel             | 0.93  | 96   | Not specified | Genotyping      | Not specified     | Healthy Israelis undergoing routine genetic carrier screening tests (...) genetic population studies.                                                                                                                                                        | Raz, 13. Frequency                     |
| Ireland | Irish                       | 0.04  | 50   | 25M,25F       | LTT (def. d)    | Mean 37.6 (16-68) | Essentially healthy Irish adults attending the out-patient department of the Charitable Infirmary                                                                                                                                                            | Fielding, 1981. The incidence          |
| Israel* | Mixed                       | 0.902 | 706  |               | Genotyping, LTT |                   |                                                                                                                                                                                                                                                              |                                        |
| Israel  | Arabs                       | 0.806 | 67   | Not specified | LTT (def. 1)    | Not specified     | Sixty-seven adult subjects were studied, 49 from Tira and 18 from Taybeah, both old established villages located on the coastal plain of Israel. All subjects were attending the government health centers of their respective villages for various reasons. | El Schallah, 73. Lactose               |
| Israel  | Ashkenazi in Israel         | 0.83  | 96   | Not specified | Genotyping      | Not specified     | Healthy Israelis undergoing routine genetic carrier screening tests (...) genetic population studies.                                                                                                                                                        | Raz, 13. Frequency                     |
| Israel  | Bedouin                     | 0.94  | 98   | Not specified | Genotyping      | Not specified     | DNA samples. Seletion criteria not further specified                                                                                                                                                                                                         | Bersaglieri, 04 (with adaptions in Ita |
| Israel  | Bedouin-Arabs in Israel     | 0.97  | 151  | Not specified | Genotyping      | Not specified     | Healthy Israelis undergoing routine genetic carrier screening tests (...) genetic population studies.                                                                                                                                                        | Raz, 13. Frequency                     |
| Israel  | Druze                       | 0.96  | 96   | Not specified | Genotyping      | Not specified     | DNA samples. Seletion criteria not further specified                                                                                                                                                                                                         | Bersaglieri, 04 (with adaptions in Ita |
| Israel  | Morrocan Jews in Israel     | 0.82  | 96   | Not specified | Genotyping      | Not specified     | Healthy Israelis undergoing routine genetic carrier screening tests (...) genetic population studies.                                                                                                                                                        | Raz, 13. Frequency                     |
| Israel  | Palestinian arabs           | 0.92  | 102  | Not specified | Genotyping      | Not specified     | DNA samples. Seletion criteria not further specified                                                                                                                                                                                                         | Bersaglieri, 04 (with adaptions in Ita |
| Italy*  | Mixed                       | 0.718 | 2693 |               |                 |                   |                                                                                                                                                                                                                                                              |                                        |
| Italy   | Apulia                      | 0.82  | 157  | 155 m, 2 f    | Genotyping      | Mean 38 (19-47)   | Blood samples of 2 healthy individuals were randomly collected.                                                                                                                                                                                              | Piepoli, 07. Genotyping                |
| Italy   | Central                     | 0.81  | 98   | Not specified | Genotyping      | Not specified     | Blood and buccal swab samples were obtained from unrelated donors upon informed consent.                                                                                                                                                                     | Anagnostou, 09. Tracing                |
| Italy   | Central populations         | 0.185 | 65   | Not specified | LTT (def. b)    | Not specified     | Mixture of blood donors, students, and obese pasients recruited from different departments of Endocrine and Metabolic Diseases.                                                                                                                              | Cavalli-Sforza, 1987. Primary          |
| Italy   | Central-North               | 0.75  | 206  | Not specified | Genotyping      | Not specified     | Blood and buccal swab samples were obtained from unrelated donors upon informed consent.                                                                                                                                                                     | Anagnostou, 09. Tracing                |
| Italy   | Napolitans                  | 0.84  | 31   | Not specified | LTT (def. f)    | Not specified     | Presumeably healthy individuals (controls).                                                                                                                                                                                                                  | Rinaldi, 84. High                      |
| Italy   | North-Eastern               | 0.57  | 219  | Not specified | Genotyping      | Not specified     | Blood and buccal swab samples were obtained from unrelated donors upon informed consent.                                                                                                                                                                     | Anagnostou, 09. Tracing                |

|            |                      |       |     |               |                 |                   |                                                                                                                                                                                                                                           |                                          |
|------------|----------------------|-------|-----|---------------|-----------------|-------------------|-------------------------------------------------------------------------------------------------------------------------------------------------------------------------------------------------------------------------------------------|------------------------------------------|
| Italy      | Northern populations | 0.517 | 89  | Not specified | LTT (def. b)    | Not specified     | Mixture of blood donors, students, and obese patients recruited from different departments of Endocrine and Metabolic Diseases.                                                                                                           | Cavalli-Sforza, 1987. Primary            |
| Italy      | North Italians       | 0.51  | 208 | Not specified | HBT (def. 1)    | Not specified     | Apparently healthy adults. Most of the subjects were staff members or students from these institutions.                                                                                                                                   | Burgio, 1984. Prevalence                 |
| Italy      | Not specified        | 0.71  | 125 | Not specified | Genotyping      | Not specified     | 125 randomly selected healthy blood donors.                                                                                                                                                                                               | Mottes, 08. Genetic                      |
| Italy      | Not specified        | 0.7   | 69  | 34 m, 35 f    | HBT (def. 1)    | Mean 40 (20-64)   | Presumably healthy individuals (controls).                                                                                                                                                                                                | Sciarretta, 84. Hydrogen                 |
| Italy      | Not specified        | 0.62  | 42  | 24 m, 18 f    | HBT (def. 1)    | Median 39 (16-73) | Healthy medical staff members and inpatients with no gastrointestinal symptoms or any systemic disease known to affect intestinal motility or absorption. Control group                                                                   | Bozzani, 1986. Lactose                   |
| Italy      | Sardinia             | 0.86  | 153 | Not specified | Genotyping      | Not specified     | Blood and buccal swab samples were obtained from unrelated donors upon informed consent.                                                                                                                                                  | Anagnostou, 09. Tracing                  |
| Italy      | Sardinia             | 0.9   | 383 | Not specified | Genotyping      | 3-19              | Patients from the Gastroenterology Unit at the Hospital Microcitemico in Cagliari, Italy. All of the patients were from Sardinia. Of the 392 patients, 9 were excluded from the study because a secondary cause of hypolactasia was found | Schirru, 07. Decline                     |
| Italy      | Sardinia             | 0.88  | 97  | 39 m, 58 f    | Genotyping      | Mean 22 (1-73)    | Blood samples of 2 healthy individuals were randomly collected.                                                                                                                                                                           | Piepoli, 07. Genotyping                  |
| Italy      | Sardinia             | 0.783 | 120 | 99 m, 21 f    | Genotyping      | Mean 35           | Healthy, asymptomatic subjects recruited randomly among hospital staff (doctors, students, etc.).                                                                                                                                         | Obinu, 10. Prevalence                    |
| Italy      | Sardinia             | 0.86  | 50  | 26M, 24F      | HBT (def. 1)    | Not specified     | Control subjects                                                                                                                                                                                                                          | Meloni, 2001                             |
| Italy      | Sicily               | 0.38  | 141 | Not specified | HBT (def. 1)    | 17-64             | A randomized sample of the general population in a small center in Sicily.                                                                                                                                                                | Carroccio, 1998. Lactose                 |
| Italy      | Sicily               | 0.71  | 100 | Not specified | HBT (def. 1)    | Not specified     | Apparently healthy adults. Most of the subjects were staff members or students from these institutions.                                                                                                                                   | Burgio, 1984. Prevalence                 |
| Italy      | Southern             | 0.85  | 189 | Not specified | Genotyping      | Not specified     | Blood and buccal swab samples were obtained from unrelated donors upon informed consent.                                                                                                                                                  | Anagnostou, 09. Tracing                  |
| Italy      | Southern populations | 0.412 | 51  | Not specified | LTT (def. b)    | Not specified     | Mixture of blood donors, students, and obese patients recruited from different departments of Endocrine and Metabolic Diseases.                                                                                                           | Cavalli-Sforza, 1987. Primary            |
| Italy      | Southern Italy       | 0.89  | 100 | Not specified | Genotyping      | Not specified     | Population samples. GenBank accession number DQ109677                                                                                                                                                                                     | Enattah, 2007. Evidence                  |
| Japan      | Not specified        | 0.725 | 40  | Not specified | LTT (def. b)    | Not specified     | Randomly selected healthy adults.                                                                                                                                                                                                         | Yoshida, 75. Studies                     |
| Jordan     | Jordanian Bedouin    | 0.43  | 46  | Not specified | Genotyping      | Not specified     | Not specified                                                                                                                                                                                                                             | Ingram, 2009. Lactose digestion (Su)     |
| Kazakhstan | Not specified        | 0.747 | 83  | Not specified | HBT (def. 1)    | Not specified     | 83 Kazakh living in the city of Gazli situated north of Bukhara city (close to the Kazakh border), belonging to the Turkic language family and being traditionally nomadic herders.                                                       | Heyer, 2011. Lactase                     |
| Kenya*     | Mixed                | 0.387 | 410 |               | Genotyping, LTT |                   |                                                                                                                                                                                                                                           |                                          |
| Kenya      | Bantu                | 1     | 24  | Not specified | Genotyping      | Not specified     | DNA samples. Selection criteria not further specified                                                                                                                                                                                     | Bersaglieri, 04 (with adaptations in Ita |
| Kenya      | Mixed                | 0.26  | 192 | Not specified | LTT (def. a)    | Not specified     |                                                                                                                                                                                                                                           | Tishkoff, 07                             |

|              |                                |       |      |               |                        |                          |                                                                                                                                                                                                                   |                                          |
|--------------|--------------------------------|-------|------|---------------|------------------------|--------------------------|-------------------------------------------------------------------------------------------------------------------------------------------------------------------------------------------------------------------|------------------------------------------|
| Kenya        | Mixed                          | 0.437 | 194  | Not specified | Genotyping             | Not specified            |                                                                                                                                                                                                                   | Tishkoff, 07                             |
| Kuwait*      | Mixed                          | 0.501 | 215  |               | Genotyping, HBT        |                          |                                                                                                                                                                                                                   |                                          |
| Kuwait       | Not specified                  | 0.47  | 70   | 35M,35F       | HBT (def. 1)           | Mean 33.4 ± 2.6          | Individuals known not to have any gastrointestinal problems                                                                                                                                                       | Al Sanae, H. 2003. Comparison            |
| Kuwait       | Kuwaiti Bedouin (Ajman tribe)  | 0.43  | 37   | 37 m, 0 f     | Genotyping             | Not specified            | DNA samples collected from ancestrally distinct male Kuwaiti Bedouin.                                                                                                                                             | Hill, 2013. Brief                        |
| Kuwait       | Kuwaiti Bedouin (Mutran tribe) | 0.45  | 29   | 29 m, 0 f     | Genotyping             | Not specified            | DNA samples collected from ancestrally distinct male Kuwaiti Bedouin.                                                                                                                                             | Hill, 2013. Brief                        |
| Kuwait       | Asians                         | 0.58  | 79   | 35M,44F       | HBT (def. 1)           | Mean 34 ± 2.84           | Healthy Asian volunteers (physicians, medical students and other hospital workers)                                                                                                                                | Al Sanae, H. 2003. Comparison            |
| Lebanon      | Not specified                  | 0.78  | 78   | 44 m, 34 f    | LTT (def. b)           | 17-43                    | Healthy volunteers, most of them medical students and university employees.                                                                                                                                       | Nasrallah, 79. Lactose                   |
| Malaysia*    | Mixed                          | 0.873 | 300  |               |                        |                          |                                                                                                                                                                                                                   |                                          |
| Malaysia     | Malays at Penang Island        | 0.88  | 100  | 68 m, 32 f    | Urine galactose excret | 18-49                    | All healthy, working or studying in the University Sains Malaysia                                                                                                                                                 | Asmawi, 2006. Hypolactasia               |
| Malaysia     | Chinese at Penang Island       | 0.91  | 100  | 41 m, 59 f    | Urine galactose excret | 18-49                    | All healthy, working or studying in the University Sains Malaysia                                                                                                                                                 | Asmawi, 2006. Hypolactasia               |
| Malaysia     | Indians at Penang Island       | 0.83  | 100  | 53m, 47 f     | Urine galactose excret | 18-49                    | All healthy, working or studying in the University Sains Malaysia                                                                                                                                                 | Asmawi, 2006. Hypolactasia               |
| Malawi*      | Mixed                          | 1     | 378  |               |                        |                          |                                                                                                                                                                                                                   |                                          |
| Malawi       | Bantu                          | 1     | 310  | Not specified | Genotyping             | Not specified            | DNA samples. Selection criteria not further specified                                                                                                                                                             | Mulcare, 04                              |
| Malawi       | Chewa                          | 1     | 68   | Not specified | Genotyping             | Not specified            | Not specified                                                                                                                                                                                                     | Jones, 2015. Diversity (supplementa      |
| Mexico*      | Mixed                          | 0.479 | 645  |               | HBT, LTT               |                          |                                                                                                                                                                                                                   |                                          |
| Mexico       | Not specified                  | 0.655 | 200  | 100 m, 100 f) | LTT (def.b)            | Mean 25,1 m, mean 24,4 f | Most of the subjects were members of the professional staff of the Institute or were medical- and nursing students. None had diabetes, chronic or acute diarrhea or any other overt disease at the time of study. | Lisker, 78. Intestinal                   |
| Mexico       | Rural Mexico (Huamantla)       | 0.74  | 100  | Not specified | LTT (def.b)            | 18-72                    | Factory workers                                                                                                                                                                                                   | Lisker, 1974. Lactase                    |
| Mexico       | North                          | 0.16  | 58   | Not specified | HBT (unspecified)      | Not specified            | Individuals randomly selected from this area in Mexico.                                                                                                                                                           | Rosado, 1994. Lactose                    |
| Mexico       | Central                        | 0.33  | 180  | Not specified | HBT (unspecified)      | Not specified            | Individuals randomly selected from this area in Mexico.                                                                                                                                                           | Rosado, 1994. Lactose                    |
| Mexico       | South                          | 0.33  | 107  | Not specified | HBT (unspecified)      | Not specified            | Individuals randomly selected from this area in Mexico.                                                                                                                                                           | Rosado, 1994. Lactose                    |
| Mongolia     | Mongol in the north of China   | 0.879 | 198  | 156M,42F      | HBT (def. 1)           | Average 21.8 (17-46)     | Healthy volunteers (students and teaching staff of the University of Inner Mongolia in Huhehot)                                                                                                                   | Wang, 84. Prevalence                     |
| Morocco*     | Mixed                          | 0.803 | 348  |               | Genotyping             |                          |                                                                                                                                                                                                                   |                                          |
| Morocco      | Berber                         | 0.75  | 154  | Not specified | Genotyping             | Not specified            | DNA samples. Selection criteria not further specified                                                                                                                                                             | Mulcare, 04                              |
| Morocco      | Moroccans                      | 0.834 | 12   | Not specified | Genotyping             | Not specified            | Population samples                                                                                                                                                                                                | Enattah, 2008. Independent               |
| Morocco      | Not specified                  | 0.689 | 90   | Not specified | Genotyping             | Not specified            | Population samples. GenBank accession number DQ109677                                                                                                                                                             | Enattah, 2007. Evidence                  |
| Mozambique   | Sena                           | 1     | 92   | Not specified | Genotyping             | Not specified            | Not specified                                                                                                                                                                                                     | Jones, 2015. Diversity (supplementa      |
| Namibia*     | Mixed                          | 0.87  | 92   |               | Genotyping             |                          |                                                                                                                                                                                                                   |                                          |
| Namibia      | San                            | 1     | 14   | Not specified | Genotyping             | Not specified            | DNA samples. Selection criteria not further specified                                                                                                                                                             | Bersaglieri, 04 (with adaptations in Ita |
| Namibia      | San                            | 1     | 22   | Not specified | Genotyping             | Not specified            | Not specified                                                                                                                                                                                                     | Jones, 2015. Diversity (supplementa      |
| Namibia      | San                            | 0.95  | 20   | Not specified | Genotyping             | Not specified            | Not specified                                                                                                                                                                                                     | Breton, 2014. Lactase                    |
| Namibia      | Khoe speaking                  | 0.5   | 22   | Not specified | Genotyping             | Not specified            | Not specified                                                                                                                                                                                                     | Breton, 2014. Lactase                    |
| Namibia      | Bantu speakers                 | 1     | 14   | Not specified | Genotyping             | Not specified            | Not specified                                                                                                                                                                                                     | Breton, 2014. Lactase                    |
| Netherlands* | Mixed                          | 0.104 | 7259 |               | Genotyping, HBT        |                          |                                                                                                                                                                                                                   |                                          |
| Netherlands  | Dutch                          | 0.167 | 48   | Not specified | HBT (not specified)    | Not specified            | Healthy students.                                                                                                                                                                                                 | Vonk, 00. Lactose                        |



|             |                                |       |      |               |                 |                   |                                                                                                                                                                     |                                        |
|-------------|--------------------------------|-------|------|---------------|-----------------|-------------------|---------------------------------------------------------------------------------------------------------------------------------------------------------------------|----------------------------------------|
| Netherlands | Dutch                          | 0.104 | 7211 | 3005M,4206F   | Genotyping      | 55+               | Two population-based cohort study on elderly dutch caucasians (6367 individuals from the Rotterdam Study and 844 from the Longitudinal Aging Study Amsterdam (LASA) | Koek, 2010. The                        |
| New Zealand | Not specified                  | 0.082 | 1064 | Not specified | Genotyping      | Not specified     | Randomly selected individuals of the New Zealand population.                                                                                                        | Upton, 10. The prevalance              |
| Nigeria     | Yoruba                         | 1     | 50   | Not specified | Genotyping      | Not specified     | DNA samples. Seletion criteria not further specified                                                                                                                | Bersaglieri, 04 (with adaptions in Ita |
| Niger       | Tuaregs in the Sahara Desert   | 0.127 | 118  | 51 m, 67 f    | HBT (def. 1)    | Mean 32,8 (18-48) | Adult Tuaregs. Selection criteria not further specified                                                                                                             | Flatz, 1986. Distribution              |
| Norway*     | Mixed                          | 0.116 | 242  |               |                 |                   |                                                                                                                                                                     |                                        |
| Norway      | Not specified                  | 0.038 | 105  | 23 m, 82 f    | HBT (def. 1)    | Mean 47           | Healthy persons as controls in the study. The majority were health workers or pensioners.                                                                           | Farup, 04. Lactose                     |
| Norway      | Multiple ethnicities           | 0.175 | 137  | 39 m, 98 f    | Genotyping      | Mean 35,3 (19-82) | Randomly selected adults.                                                                                                                                           | Reinton, 07. Evaluation                |
| Oman*       | Mixed                          | 0.959 | 1132 |               |                 |                   |                                                                                                                                                                     |                                        |
| Oman        | Arabs of Northern Oman         | 0.973 | 342  | Not specified | Genotyping      | 20-50             | Randomly collected samples of adult healthy Omanis.                                                                                                                 | Al-Abri, 2012. Distribution            |
| Oman        | Omanis of Asian origin         | 0.719 | 96   | Not specified | Genotyping      | 20-50             | Randomly collected samples of adult healthy Omanis.                                                                                                                 | Al-Abri, 2012. Distribution            |
| Oman        | Dhofori Arabs of Southern Oman | 1     | 210  | Not specified | Genotyping      | 20-50             | Randomly collected samples of adult healthy Omanis.                                                                                                                 | Al-Abri, 2012. Distribution            |
| Oman        | Saudi Arabs                    | 0.998 | 432  | Not specified | Genotyping      | 20-50             | Randomly collected samples of adult healthy Omanis.                                                                                                                 | Al-Abri, 2012. Distribution            |
| Oman        | Not specified                  | 0.81  | 52   | 31 m, 21 f    | HBT (def. 1)    | Mean 25 (19-42)   | Fifty-two university students and staff from different regions of the Sultanate of Oman volunteered for the study.                                                  | Al-Abri, A. 2013. The phenotype        |
| Pakistan*   | Mixed                          | 0.649 | 712  |               | Genotyping, LTT |                   |                                                                                                                                                                     |                                        |
| Pakistan    | Balti                          | 1     | 23   | Not specified | Genotyping      | Not specified     | Population samples. GenBank accession number DQ109677                                                                                                               | Enattah, 2007. Evidence                |
| Pakistan    | Balochi                        | 0.41  | 50   | Not specified | Genotyping      | Not specified     | DNA samples. Seletion criteria not further specified                                                                                                                | Bersaglieri, 04 (with adaptions in Ita |
| Pakistan    | Baluch                         | 0.526 | 19   | Not specified | Genotyping      | Not specified     | Population samples. GenBank accession number DQ109677                                                                                                               | Enattah, 2007. Evidence                |
| Pakistan    | Brahui                         | 0.44  | 50   | Not specified | Genotyping      | Not specified     | DNA samples. Seletion criteria not further specified                                                                                                                | Bersaglieri, 04 (with adaptions in Ita |
| Pakistan    | Brahui                         | 0.567 | 30   | Not specified | Genotyping      | Not specified     | Population samples. GenBank accession number DQ109677                                                                                                               | Enattah, 2007. Evidence                |
| Pakistan    | Burusho                        | 0.81  | 50   | Not specified | Genotyping      | Not specified     | DNA samples. Seletion criteria not further specified                                                                                                                | Bersaglieri, 04 (with adaptions in Ita |
| Pakistan    | Burusho                        | 0.967 | 30   | Not specified | Genotyping      | Not specified     | Population samples. GenBank accession number DQ109677                                                                                                               | Enattah, 2007. Evidence                |
| Pakistan    | Hazara                         | 0.85  | 50   | Not specified | Genotyping      | Not specified     | DNA samples. Seletion criteria not further specified                                                                                                                | Bersaglieri, 04 (with adaptions in Ita |
| Pakistan    | Hazara                         | 0.929 | 14   | Not specified | Genotyping      | Not specified     | Population samples. GenBank accession number DQ109677                                                                                                               | Enattah, 2007. Evidence                |
| Pakistan    | Kalash                         | 1     | 50   | Not specified | Genotyping      | Not specified     | DNA samples. Seletion criteria not further specified                                                                                                                | Bersaglieri, 04 (with adaptions in Ita |
| Pakistan    | Kalash                         | 1     | 30   | Not specified | Genotyping      | Not specified     | Population samples. GenBank accession number DQ109677                                                                                                               | Enattah, 2007. Evidence                |
| Pakistan    | Kashmiri                       | 0.75  | 20   | Not specified | Genotyping      | Not specified     | Population samples. GenBank accession number DQ109677                                                                                                               | Enattah, 2007. Evidence                |
| Pakistan    | Makrani Baluch                 | 0.655 | 29   | Not specified | Genotyping      | Not specified     | Population samples. GenBank accession number DQ109677                                                                                                               | Enattah, 2007. Evidence                |
| Pakistan    | Mohannes                       | 0.552 | 29   | Not specified | Genotyping      | Not specified     | Population samples. GenBank accession number DQ109677                                                                                                               | Enattah, 2007. Evidence                |
| Pakistan    | Parsi                          | 0.724 | 29   | Not specified | Genotyping      | Not specified     | Population samples. GenBank accession number DQ109677                                                                                                               | Enattah, 2007. Evidence                |

|                            |                                     |       |     |                               |                        |                                       |                                                                                                                                                                                                                                                                                                                    |                                          |
|----------------------------|-------------------------------------|-------|-----|-------------------------------|------------------------|---------------------------------------|--------------------------------------------------------------------------------------------------------------------------------------------------------------------------------------------------------------------------------------------------------------------------------------------------------------------|------------------------------------------|
| Pakistan                   | Pathan                              | 0.49  | 50  | Not specified                 | Genotyping             | Not specified                         | DNA samples. Selection criteria not further specified                                                                                                                                                                                                                                                              | Bersaglieri, 04 (with adaptations in Ita |
| Pakistan                   | Pathan                              | 0.429 | 28  | Not specified                 | Genotyping             | Not specified                         | Population samples. GenBank accession number DQ109677                                                                                                                                                                                                                                                              | Enattah, 2007. Evidence                  |
| Pakistan                   | Punjabi                             | 0.45  | 53  | 43 m, 10 f                    | LTT (def. b)           | 13-65                                 | 44 patients from Rawalpindi General Hospital, Rawalpindi, andt                                                                                                                                                                                                                                                     | Abbas, H. 1983. Persistence              |
| Pakistan                   | Sindhi                              | 0.46  | 50  | Not specified                 | Genotyping             | Not specified                         | DNA samples. Selection criteria not further specified                                                                                                                                                                                                                                                              | Bersaglieri, 04 (with adaptations in Ita |
| Pakistan                   | Sindi                               | 0.357 | 28  | Not specified                 | Genotyping             | Not specified                         | Population samples. GenBank accession number DQ109677                                                                                                                                                                                                                                                              | Enattah, 2007. Evidence                  |
| Papua New Guinea*          | Mixed                               | 0.883 | 69  |                               | Genotyping, HBT        |                                       |                                                                                                                                                                                                                                                                                                                    |                                          |
| Papua New Guinea Provinces | East and West Sepik                 | 0.77  | 35  | Not specified                 | HBT (def. 1)           | Not specified                         | Adult volunteers. Only one of these suffered with gastro-intestinal symptoms. The sample was not ethnically coherent, though it generally represented the north-west of Papua New Guinea.                                                                                                                          | Arnhold, 1981. Persistent                |
| Papua New Guinea           | Papuan                              | 1     | 34  | Not specified                 | Genotyping             | Not specified                         | DNA samples. Selection criteria not further specified                                                                                                                                                                                                                                                              | Bersaglieri, 04 (with adaptations in Ita |
| Poland*                    | Mixed                               | 0.347 | 496 |                               | Genotyping, HBT, LTT   |                                       |                                                                                                                                                                                                                                                                                                                    |                                          |
| Poland                     | Not specified                       | 0.375 | 275 | 61 m, 214 f                   | HBT (unspecified)      | Mean 29,1                             | Apparently healthy Polish individuals                                                                                                                                                                                                                                                                              | Socha, 84. Prevalence                    |
| Poland                     | Not specified                       | 0.315 | 200 | Not specified                 | Genotyping             | 18-20                                 | Randomly chosen healthy subjects of Polish origin                                                                                                                                                                                                                                                                  | Madry, 10. Adult-type                    |
| Poland                     | Polish immigrants in Western Canada | 0.285 | 21  | 16 m, 22 f (the entire study) | LTT (def. b)           | Mean 29,8 (17-65). (The entire study) | 38 healthy adults of Slavic origin who had recently left Eastern Europe and are presently living in Western Canada. Twenty-one of them were born in Poland and 17 in Czechoslovakia. They were either new immigrants or tourists who left their respective countries from 1 month to 5 years ago (mean 2.5 years). | Leichter, 1972. Lactose                  |
| Portugal*                  | Mixed                               | 0.402 | 199 | Not specified                 | Genotyping             | Not specified                         | Non-related, randomly chosen, native individuals from Portugal.                                                                                                                                                                                                                                                    | Manco, 2013. Distribution                |
| Portugal                   | Portugal North                      | 0.328 | 64  | Not specified                 | Genotyping             | Not specified                         | Non-related, randomly chosen, native individuals from Portugal.                                                                                                                                                                                                                                                    | Manco, 2013. Distribution                |
| Portugal                   | Portugal Centre                     | 0.357 | 70  | Not specified                 | Genotyping             | Not specified                         | Non-related, randomly chosen, native individuals from Portugal.                                                                                                                                                                                                                                                    | Manco, 2013. Distribution                |
| Portugal                   | Portugal South                      | 0.523 | 65  | Not specified                 | Genotyping             | Not specified                         | Non-related, randomly chosen, native individuals from Portugal.                                                                                                                                                                                                                                                    | Manco, 2013. Distribution                |
| Rwanda*                    | Mixed                               | 0.49  | 102 | Not specified                 | Urine galactose excret | Not specified                         | Healthy volunteers and students                                                                                                                                                                                                                                                                                    |                                          |
| Rwanda                     | Hutu-Hutu                           | 0.58  | 36  | Not specified                 | Urine galactose excret | Not specified                         | Healthy volunteers and students                                                                                                                                                                                                                                                                                    | Cox, 1974                                |
| Rwanda                     | Hutu-Tutsi                          | 0.55  | 11  | Not specified                 | Urine galactose excret | Not specified                         | Healthy volunteers and students                                                                                                                                                                                                                                                                                    | Cox, 1974                                |
| Rwanda                     | Shi                                 | 0.96  | 28  | Not specified                 | Urine galactose excret | Not specified                         | Healthy volunteers and students                                                                                                                                                                                                                                                                                    | Cox, 1974                                |
| Rwanda                     | Tussi-Tutsi                         | 0.074 | 27  | Not specified                 | Urine galactose excret | Not specified                         | Healthy volunteers and students                                                                                                                                                                                                                                                                                    | Cox, 1974                                |
| Russia*                    | Mixed                               | 0.565 | 637 | Not specified                 | Genotyping             |                                       |                                                                                                                                                                                                                                                                                                                    |                                          |
| Russian                    | Adygei                              | 0.78  | 34  | Not specified                 | Genotyping             | Not specified                         | DNA samples. Selection criteria not further specified                                                                                                                                                                                                                                                              | Bersaglieri, 04 (with adaptations in Ita |
| Russia                     | Daghestan Druss                     | 0.765 | 17  | Not specified                 | Genotyping             | Not specified                         | Population samples. GenBank accession number DQ109677                                                                                                                                                                                                                                                              | Enattah, 2007. Evidence                  |
| Russia                     | Daghestan Nog                       | 0.75  | 20  | Not specified                 | Genotyping             | Not specified                         | Population samples. GenBank accession number DQ109677                                                                                                                                                                                                                                                              | Enattah, 2007. Evidence                  |
| Russia                     | Daghestan mixed                     | 0.826 | 23  | Not specified                 | Genotyping             | Not specified                         | Population samples. GenBank accession number DQ109677                                                                                                                                                                                                                                                              | Enattah, 2007. Evidence                  |
| Russia                     | Erzyas                              | 0.567 | 30  | Not specified                 | Genotyping             | Not specified                         | Population samples. GenBank accession number DQ109677                                                                                                                                                                                                                                                              | Enattah, 2007. Evidence                  |

|                 |                                |       |     |               |              |               |                                                                                                                                                                                                                   |                                          |
|-----------------|--------------------------------|-------|-----|---------------|--------------|---------------|-------------------------------------------------------------------------------------------------------------------------------------------------------------------------------------------------------------------|------------------------------------------|
| Russia          | Komi                           | 0.7   | 10  | Not specified | Genotyping   | Not specified | Population samples. GenBank accession number DQ109677                                                                                                                                                             | Enattah, 2007. Evidence                  |
| Russia          | Mokshas                        | 0.434 | 30  | Not specified | Genotyping   | Not specified | Population samples. GenBank accession number DQ109677                                                                                                                                                             | Enattah, 2007. Evidence                  |
| Russia          | Northern Russia                | 0.356 | 231 | Not specified | Genotyping   | 17-26         | Medical students of Russian origin. Northern Russia. Presumably healthy.                                                                                                                                          | Khabarova, 2009. Prevalence              |
| Russia          | Ob-Ugric speakers              | 0.94  | 62  | Not specified | Genotyping   | Not specified | Population samples. GenBank accession number DQ109677                                                                                                                                                             | Enattah, 2007. Evidence                  |
| Russia          | Russian                        | 0.58  | 50  | Not specified | Genotyping   | Not specified | DNA samples. Selection criteria not further specified                                                                                                                                                             | Bersaglieri, 04 (with adaptations in Ita |
| Russia          | Saami (Kildin)                 | 0.48  | 50  | Not specified | LTT (def. g) | 18-55         | Unrelated with no diagnosed or suspected genetic or chronic disease                                                                                                                                               | Kozlov, 97                               |
| Russia          | Udmurts                        | 0.4   | 30  | Not specified | Genotyping   | Not specified | Population samples. GenBank accession number DQ109677                                                                                                                                                             | Enattah, 2007. Evidence                  |
| Russia          | Yakut (Siberia)                | 0.88  | 50  | Not specified | Genotyping   | Not specified | DNA samples. Selection criteria not further specified                                                                                                                                                             | Bersaglieri, 04 (with adaptations in Ita |
| Solomon Islands | Melanesian                     | 1     | 44  | Not specified | Genotyping   | Not specified | DNA samples. Selection criteria not further specified                                                                                                                                                             | Bersaglieri, 04 (with adaptations in Ita |
| Saudi Arabia*   | Mixed                          | 0.228 | 556 | Not specified | Genotyping   | Not specified | Not specified                                                                                                                                                                                                     | Enattah, 2008, Independent               |
| Saudi Arabia    | Arabs                          | 0.218 | 124 | Not specified | Genotyping   | Not specified | Not specified                                                                                                                                                                                                     | Enattah, 2008, Independent               |
| Saudi Arabia    | Mixed                          | 0.231 | 432 | Not specified | Genotyping   | Neonates      | Neonatal samples (blood donors)                                                                                                                                                                                   | Imtiaz, 2007                             |
| Senegal*        | Mixed                          | 1     | 382 | Not specified | Genotyping   | Not specified | Not specified                                                                                                                                                                                                     | Imtiaz, 2007                             |
| Senegal         | Mandjak                        | 1     | 186 | Not specified | Genotyping   | Not specified | DNA samples. Selection criteria not further specified                                                                                                                                                             | Mulcare, 04                              |
| Senegal         | Mandjak                        | 1     | 92  | Not specified | Genotyping   | Not specified | Not specified                                                                                                                                                                                                     | Jones, 2015. Diversity (supplementa      |
| Senegal         | Wolof                          | 1     | 20  | Not specified | Genotyping   | Not specified | DNA samples. Selection criteria not further specified                                                                                                                                                             | Mulcare, 04                              |
| Senegal         | Wolof                          | 1     | 84  | Not specified | Genotyping   | Not specified | Not specified                                                                                                                                                                                                     | Jones, 2015. Diversity (supplementa      |
| Somalia         |                                | 0.937 | 79  | Not specified | Genotyping   | Not specified | Population samples. GenBank accession number DQ109677                                                                                                                                                             | Enattah, 2007. Evidence                  |
| South Africa*   | Mixed                          | 0.767 | 351 | Not specified | Genotyping   | Not specified | Not specified                                                                                                                                                                                                     | Enattah, 2007. Evidence                  |
| South Africa    | Askham and Wellington Coloured | 0.55  | 40  | Not specified | Genotyping   | Not specified | Not specified                                                                                                                                                                                                     | Breton, 2014. Lactase                    |
| South Africa    | South African black population | 0.783 | 115 | Not specified | HBT (def. 4) | Not specified | Healthy persons free for gastrointestinal symptoms, from six different tribes.                                                                                                                                    | Segal, 83. Lactase                       |
| South Africa    | Zulu                           | 0.813 | 32  | Not specified | HBT (def. 4) | Mean 34       | Healthy persons free for gastrointestinal symptoms.                                                                                                                                                               | Segal, 83. Lactase                       |
| South Africa    | Tswana                         | 0.833 | 24  | Not specified | HBT (def. 4) | Mean 33.4     | Healthy persons free for gastrointestinal symptoms.                                                                                                                                                               | Segal, 83. Lactase                       |
| South Africa    | Sotho                          | 0.652 | 23  | Not specified | HBT (def. 4) | Mean 31       | Healthy persons free for gastrointestinal symptoms.                                                                                                                                                               | Segal, 83. Lactase                       |
| South Africa    | Xhosa                          | 0.824 | 17  | Not specified | HBT (def. 4) | Mean 27.2     | Healthy persons free for gastrointestinal symptoms.                                                                                                                                                               | Segal, 83. Lactase                       |
| South Africa    | Swazi                          | 0.75  | 12  | Not specified | HBT (def. 4) | Mean 33.5     | Healthy persons free for gastrointestinal symptoms.                                                                                                                                                               | Segal, 83. Lactase                       |
| South Africa    | Shangaan                       | 0.86  | 7   | Not specified | HBT (def. 4) | Mean 35.7     | Healthy persons free for gastrointestinal symptoms.                                                                                                                                                               | Segal, 83. Lactase                       |
| South Africa    | Colesberg Coloured             | 0.85  | 20  | Not specified | Genotyping   | Not specified | DNA samples. Selection criteria not further specified                                                                                                                                                             | Breton, 2014. Lactase                    |
| South Africa    | San                            | 0.8   | 20  | Not specified | Genotyping   | Not specified | DNA samples. Selection criteria not further specified                                                                                                                                                             | Breton, 2014. Lactase                    |
| South Africa    | Bantu speakers                 | 0.83  | 41  | Not specified | Genotyping   | Not specified | DNA samples. Selection criteria not further specified                                                                                                                                                             | Breton, 2014. Lactase                    |
| South Korea*    | Mixed                          | 1     | 499 | Not specified | Genotyping   | Not specified | Not specified                                                                                                                                                                                                     | Enattah, 2007. Evidence                  |
| South Korea     | South Korean children          | 1     | 476 | 282M,194F     | Genotyping   | Mean 10.6     | Healthy control group included children with past history of neurologic disorders, upper respiratory tract infection, skin disease, and other diseases, but not gastroenteritis. Selection criteria not specified | Choi, 2013. No association               |
| South Korea     | South Korean                   | 1     | 23  | Not specified | Genotyping   | Not specified | Population samples. GenBank accession number DQ109677                                                                                                                                                             | Enattah, 2007. Evidence                  |
| Spain*          | Mixed                          | 0.285 | 819 | Not specified | Genotyping   | Not specified | Not specified                                                                                                                                                                                                     | Enattah, 2007. Evidence                  |

|           |                                            |       |      |                 |                       |                                                 |                                                                                                                                                                                                                                              |                                     |
|-----------|--------------------------------------------|-------|------|-----------------|-----------------------|-------------------------------------------------|----------------------------------------------------------------------------------------------------------------------------------------------------------------------------------------------------------------------------------------------|-------------------------------------|
| Spain     | Galicia                                    | 0.35  | 546  | About 46.7% men | HBT (def. 1)          | 14-85                                           | Healthy subjects. No history of GI illness. Sample method not specified                                                                                                                                                                      | Leis, 97. Prevalence                |
| Spain     | Basques                                    | 0.083 | 85   | Not specified   | Genotyping            | Not specified                                   | Population samples. GenBank accession number DQ109677                                                                                                                                                                                        | Enattah, 2007. Evidence             |
| Spain     | Basque Country.<br>Ethnicity not specified | 0.186 | 188  | 88M,100F        | Genotyping            | Mean 40 ±<br>12.94 (19-61)                      | Non-IBD patients designated as healthy controls, recruited blood bank                                                                                                                                                                        | Elguezabal, 2012. Lactase           |
| Sri Lanka | Not specified                              | 0.725 | 200  | 23 m, 177 f     | LTT (def. a)          | 16-78                                           | Patients who presented with trivial nongastrointestinal complaints such as coryza, head-ache, and nonspecific chest pain. Those who presented with gastrointestinal symptoms were excluded.                                                  | Senewiratne, 77. Intestinal         |
| Sudan*    | Mixed                                      | 0.527 | 1752 |                 | Genotyping, HBT, LTT  |                                                 |                                                                                                                                                                                                                                              |                                     |
| Sudan     | Beni Amer                                  | 0.257 | 154  | Not specified   | Genotyping            | Not specified                                   | Not specified                                                                                                                                                                                                                                | Jones, 2015. Diversity (supplementa |
| Sudan     | Fulani                                     | 0.296 | 44   | Not specified   | Genotyping (only 1391 | Not specified                                   | Population samples. GenBank accession number DQ109677                                                                                                                                                                                        | Enattah, 2007. Evidence             |
| Sudan     | Dinka                                      | 1     | 68   | Not specified   | Genotyping (only 1391 | Not specified                                   | DNA samples. Selection criteria not further specified                                                                                                                                                                                        | Mulcare, 04                         |
| Sudan     | Ga'ali                                     | 1     | 60   | Not specified   | Genotyping (only 1391 | Not specified                                   | DNA samples. Selection criteria not further specified                                                                                                                                                                                        | Mulcare, 04                         |
| Sudan     | Nuer                                       | 1     | 26   | Not specified   | Genotyping (only 1391 | Not specified                                   | DNA samples. Selection criteria not further specified                                                                                                                                                                                        | Mulcare, 04                         |
| Sudan     | Shaigi                                     | 1     | 22   | Not specified   | Genotyping (only 1391 | Not specified                                   | DNA samples. Selection criteria not further specified                                                                                                                                                                                        | Mulcare, 04                         |
| Sudan     | Mixed                                      | 0.14  | 43   | Not specified   | LTT (def. a)          | Not specified                                   | People from different areas in Sudan.                                                                                                                                                                                                        | Tishkoff, 07                        |
| Sudan     | Mixed                                      | 0.766 | 44   | Not specified   | Genotyping            | Not specified                                   |                                                                                                                                                                                                                                              | Tishkoff, 07                        |
| Sudan     | Not specified                              | 0.551 | 563  | 549 m, 14 f     | HBT (def. 1)          | Adults (age not specified)<br>Mean 22,6 (14-50) | 563 healthy adults. 533 from the Sudanese Peoples Armed Forces, 30 students and employees of the Faculty of Medicine (University of Khartoum)                                                                                                | Bayoumi, 1981. Distribution         |
| Sudan     | Beja tribe                                 | 0.168 | 303  | 277 m, 76 f     | HBT (def. 1)          | Mean 20,2 (14-42)                               | 585 apparently healthy, well nourished probands.                                                                                                                                                                                             | Bayoumi, 1982. Beja and Nilotes     |
| Sudan     | Nilotic tribe                              | 0.745 | 282  | 206 m, 76 f     | HBT (def. 1)          | 42)                                             | 585 apparently healthy, well nourished probands.                                                                                                                                                                                             | Bayoumi, 1982. Beja and Nilotes     |
| Sudan     | Jaali                                      | 0.574 | 128  | Not specified   | Genotyping            | Not specified                                   | Not specified                                                                                                                                                                                                                                | Jones, 2015. Diversity (supplementa |
| Sudan     | Sahas                                      | 0.733 | 15   | Not specified   | Genotyping            | Not specified                                   | Population samples                                                                                                                                                                                                                           | Enattah, 2008. Independent          |
| Syria     | Arabs in Syria, Iraq, Lebanon, Palestine   | 0.842 | 19   | Not specified   | Genotyping            | Not specified                                   | Population samples                                                                                                                                                                                                                           | Enattah, 2008. Independent          |
| Sweden    | Elderly individuals                        | 0.068 | 392  | Not specified   | Genotyping            | 1928.                                           | The majority of the subjects of this study population were born between 1920 and 1932, the mean year of birth 1928. This group constituted a non-randomly sampled cohort re-cruited from study circles for the elderly. All were Caucasians. | Almon, R. 2007. Prevalence          |
| Tanzania* | Mixed                                      | 0.454 | 577  |                 | Genotyping, HBT, LTT  |                                                 |                                                                                                                                                                                                                                              |                                     |
| Tanzania  | Mixed                                      | 0.344 | 235  | Not specified   | LTT (def. a)          | Not specified                                   | People from different areas in Tanzania.                                                                                                                                                                                                     | Tishkoff, 07                        |
| Tanzania  | Mixed                                      | 0.458 | 256  | Not specified   | Genotyping            | Not specified                                   |                                                                                                                                                                                                                                              | Tishkoff, 07                        |
| Tanzania  | Chagga                                     | 0.74  | 86   | Not specified   | Genotyping            | Not specified                                   | Not specified                                                                                                                                                                                                                                | Jones, 2015. Diversity (supplementa |

|          |                                                                      |       |                   |                      |                 |                                                                                                                                                                                                                                                                                          |                            |
|----------|----------------------------------------------------------------------|-------|-------------------|----------------------|-----------------|------------------------------------------------------------------------------------------------------------------------------------------------------------------------------------------------------------------------------------------------------------------------------------------|----------------------------|
| Thailand | Not specified                                                        | 0.385 | 39 11 m, 28 f     | HBT (def. 1)         | 18-41           | Randomly selected healthy volunteers.                                                                                                                                                                                                                                                    | Soontornchai, 99. Lactitol |
| Turkey*  | Mixed                                                                | 0.648 | 609               | Genotyping, HBT, LTT |                 |                                                                                                                                                                                                                                                                                          |                            |
| Turkey   | Not specified                                                        | 0.217 | 92 49 m, 43 f     | HBT (def. 1)         | Mean 44.8       | Randomly selected healthy volunteers.                                                                                                                                                                                                                                                    | Ahishali, 15. Assessment   |
| Turkey   | Not specified                                                        | 0.83  | 47 27 m, 20 f     | LTT (def. c)         | Not specified   | Randomly selected healthy volunteers.                                                                                                                                                                                                                                                    | Artan, 98. Urinary         |
| Turkey   | Central Anatolia                                                     | 0.71  | 104 N/A           | HBT                  | Not specified   | N/A                                                                                                                                                                                                                                                                                      | Flatz, 1986. Turkey        |
| Turkey   | Eastern Anatolia                                                     | 0.74  | 122 N/A           | HBT                  | Not specified   | N/A                                                                                                                                                                                                                                                                                      | Flatz, 1986. Turkey        |
| Turkey   | North coast                                                          | 0.69  | 64 N/A            | HBT                  | Not specified   | N/A                                                                                                                                                                                                                                                                                      | Flatz, 1986. Turkey        |
| Turkey   | South coast                                                          | 0.72  | 54 N/A            | HBT                  | Not specified   | N/A                                                                                                                                                                                                                                                                                      | Flatz, 1986. Turkey        |
| Turkey   | Western Anatolia                                                     | 0.7   | 126 N/A           | HBT                  | Not specified   | N/A                                                                                                                                                                                                                                                                                      | Flatz, 1986. Turkey        |
| Uganda*  | Mixed                                                                | 0.913 | 70 Not specified  | Genotyping, HBT, LTT |                 |                                                                                                                                                                                                                                                                                          |                            |
| Uganda   | Bantu                                                                | 1     | 44 Not specified  | Genotyping           | Not specified   | DNA samples. Selection criteria not further specified                                                                                                                                                                                                                                    | Mulcare, 04                |
| Uganda   | Nilotic                                                              | 0.44  | 9 Not specified   | LTT (def. b)         | Mean 22 (16-35) | Healthy volunteers                                                                                                                                                                                                                                                                       | Cook, 1966.                |
| Uganda   | Ugandan Bantu                                                        | 0.94  | 17 Not specified  | LTT (def. b)         | Mean 23 (17-30) | Healthy volunteers                                                                                                                                                                                                                                                                       | Cook, 1966.                |
| Uruguay* | Mixed                                                                | 0.649 | 240 Not specified | HBT                  | 20-86           |                                                                                                                                                                                                                                                                                          |                            |
| Uruguay  | Adults (black and white combined)                                    | 0.65  | 120 Not specified | HBT (def. 1)         | 20-86           | Randomly selected patients without previous knowledge of their race or place of origin. Those who had diabetes, a gastroenterologic disease or had taken or were taking antibiotics were not allowed to enroll. Doctors and nurses were included in the study. All were born in Uruguay. | Maggi, 87. Lactose         |
| Uruguay  | White adults                                                         | 0.63  | 109 Not specified | HBT (def. 1)         | 20-86           | Randomly selected patients without previous knowledge of their race or place of origin. Those who had diabetes, a gastroenterologic disease or had taken or were taking antibiotics were not allowed to enroll. Doctors and nurses were included in the study. All were born in Uruguay. | Maggi, 87. Lactose         |
| Uruguay  | Black                                                                | 0.82  | 11 Not specified  | HBT (def. 1)         | 20-86           | Randomly selected patients without previous knowledge of their race or place of origin. Those who had diabetes, a gastroenterologic disease or had taken or were taking antibiotics were not allowed to enroll. Doctors and nurses were included in the study. All were born in Uruguay. | Maggi, 87. Lactose         |
| USA*     | Mixed                                                                | 0.525 | 373               |                      |                 |                                                                                                                                                                                                                                                                                          |                            |
| USA      | Full blooded Indians of the Great Basin (USA) and American Southwest | 0.92  | 100 Not specified | LTT (def. b)         | 18+             | Healthy volunteers (students)                                                                                                                                                                                                                                                            | Johnson, 1978. Lactose     |
| USA      | African Americans                                                    | 0.88  | 50 Not specified  | Genotyping           | Not specified   | Population samples. GenBank accession number DQ109677                                                                                                                                                                                                                                    | Enattah, 2007. Evidence    |
| USA      | Black                                                                | 0.58  | 33 26 m, 7 f      | LTT (def. f)         | 11-18.          | Randomly selected healthy persons (black) from a pediatric comprehensive care population.                                                                                                                                                                                                | Mitchell, 75. Tolerance    |
| USA      | Black (African descent) in Huntsville, Alabama                       | 0.5   | 52 26 m, 26 f     | HBT (def. 1)         | 20-89           | Randomly selected from the U.S. Army, senior citizens' centers, nursing homes and Alabama A&M University, all located in Huntsville, Alabama.                                                                                                                                            | Rao, 94. Prevalence        |
| USA      | White (North central European descent) in Huntsville, Alabama        | 0.17  | 46 19 m, 27 f     | HBT (def. 1)         | 20-89           | Randomly selected from the U.S. Army, senior citizens' centers, nursing homes and Alabama A&M University, all located in Huntsville, Alabama.                                                                                                                                            | Rao, 94. Prevalence        |

|                           |                         |       |     |               |              |                 |                                                                                                                                                                                                         |                             |
|---------------------------|-------------------------|-------|-----|---------------|--------------|-----------------|---------------------------------------------------------------------------------------------------------------------------------------------------------------------------------------------------------|-----------------------------|
| USA                       | Utah                    | 0.076 | 92  | Not specified | Genotyping   | Not specified   | Population samples. GenBank accession number DQ109677                                                                                                                                                   | Enattah, 2007. Evidence     |
| Uzbekistan                | Tajiko-Uzbek in Bukhara | 0.89  | 100 | Not specified | HBT (def. 1) | Not specified   | Unrelated adult individuals living in the city of Gazli, belonging to the Turkish language family.                                                                                                      | Heyer, 2011. Lactase        |
| Vietnam                   | Vietnamese in USA       | 1     | 31  | 23 m, 8 f     | LTT (def. e) | Mean 37 (22-63) | Vietnamese who had been in USA for 0,5 to 19 months (average 4,5 months) at the time of their tests. All of their parents were born in Vietnam. It is not specified how they were picked for the study. | Anh, N. 1977. Lactose       |
| Western Sahara/MiSaharawi |                         | 0.53  | 68  | Not specified | Genotyping   | Not specified   |                                                                                                                                                                                                         |                             |
| Western Sahara/MiSaharawi |                         | 0.509 | 57  | Not specified | Genotyping   | Not specified   | Population samples. GenBank accession number DQ109677                                                                                                                                                   | Enattah, 2007. Evidence     |
| Western Sahara/MiSaharawi |                         | 0.636 | 11  | Not specified | Genotyping   | Not specified   | Population samples.                                                                                                                                                                                     | Enattah, 2008. Independent  |
| Yemen                     | Yemenis                 | 0.998 | 239 | Not specified | Genotyping   | 20-25           | Random samples from adult healthy Yemeni students from Sana'a University.                                                                                                                               | Al-Abri, 2012. Distribution |

HBT definition 1:  
Dosage of 50g  
lactose digested.

LM diagnosed  
when hydrogen  
concentration rose  
above 20 ppm  
from a baseline  
value.

HBT def. 2: Dosage of 25g  
lactose digested. LM  
diagnosed when  
hydrogen concentration  
rose above 20 ppm from  
a baseline value.

HBT def. 3: Dosage of  
50g lactose digested.  
LM diagnosed when  
hydrogen  
concentration rose  
≥10 ppm from a  
baseline value for at  
least two consecutive  
15 min readings

HBT def. 4: Dosage of  
50g lactose. An  
increase of less than  
30 ppm hydrogen in  
expired breath  
following a lactose  
load correlated with  
an increase in blood  
glucose of at least 1  
mmol/l in the lactose  
tolerance test.

|                                                                                                                                                                                                                                           |                                                                                                                                                                                            |                                                                                                                                                                                                                                        |                                                                                                                                            |                                                                                                                               |                                                                  |                                                                                                                                                                              |
|-------------------------------------------------------------------------------------------------------------------------------------------------------------------------------------------------------------------------------------------|--------------------------------------------------------------------------------------------------------------------------------------------------------------------------------------------|----------------------------------------------------------------------------------------------------------------------------------------------------------------------------------------------------------------------------------------|--------------------------------------------------------------------------------------------------------------------------------------------|-------------------------------------------------------------------------------------------------------------------------------|------------------------------------------------------------------|------------------------------------------------------------------------------------------------------------------------------------------------------------------------------|
| <p>LTT (def. a): A peak blood-glucose rise of 20mg/dl or lower in the capillary blood above fasting levels (or rise of 21-25 g/100 ml together with symptoms of intolerance) elicited within 24 hours after the ingestion of lactose.</p> | <p>LTT (def. b) Individuals whose blood glucose rose over the fasting level by 20 mg/dl or more at any time point were classified as lactose absorbers. LM: failure to reach 20 mg/dl.</p> | <p>LTT (def. c) Measurement of urinary galactose in pooled 2-hr urine samples following ingestion of an oral lactose dose of 40 g. LM was defined as urine excretions per 2 hours of less than 0.075 galactose:creatinine (mg/mg).</p> | <p>LTT (def. d) Low lactase activity of below 25unit/gram of protein (normal if 30 or greater and borderline if between 25 and 29.99).</p> | <p>LTT (def. e) Abnormal LTT with a mean blood glucose rise of 5 mg/100 ml over fasting levels (range 0 to 16 mg/100 ml).</p> | <p>LTT (def. f): Malabsorbers if blood glucose &lt; 26 mg/dL</p> | <p>LTT (def. g): LM if capillary glucose level increase &lt; 1,1 mmol/L, immediately and 40 minutes after ingesting 50g lactose in 400 mL water after overnight fasting.</p> |
|-------------------------------------------------------------------------------------------------------------------------------------------------------------------------------------------------------------------------------------------|--------------------------------------------------------------------------------------------------------------------------------------------------------------------------------------------|----------------------------------------------------------------------------------------------------------------------------------------------------------------------------------------------------------------------------------------|--------------------------------------------------------------------------------------------------------------------------------------------|-------------------------------------------------------------------------------------------------------------------------------|------------------------------------------------------------------|------------------------------------------------------------------------------------------------------------------------------------------------------------------------------|
